# Supplementary material for: Network meta-analysis: application and practice using Stata
Source: PubMed Central journal article supplement (PMC5733388; doi:10.4178/epih.e2017047), 2017-10-27
Supplement: epih-39-e2017047-app2.pdf [file epih-39-e2017047-app2.pdf]

Appendix 2. A network league table based on the network meta-analysis from data in appendix 1

|         |      |      |               |      |      |               |      |      |             |      |      |             |  |
|---------|------|------|---------------|------|------|---------------|------|------|-------------|------|------|-------------|--|
| Placebo | CIL  | CIU  |               |      |      |               |      |      |             |      |      |             |  |
| 0.34    | 0.25 | 0.48 | IV_singl<br>e | CIL  | CIU  |               |      |      |             |      |      |             |  |
| 0.23    | 0.15 | 0.35 | 0.66          | 0.39 | 1.13 | IV_doubl<br>e | CIL  | CIU  |             |      |      |             |  |
| 0.30    | 0.19 | 0.47 | 0.88          | 0.52 | 1.49 | 1.33          | 0.76 | 2.32 | Topica<br>l | CIL  | CIU  |             |  |
| 0.04    | 0.01 | 0.19 | 0.10          | 0.02 | 0.55 | 0.16          | 0.03 | 0.87 | 0.12        | 0.02 | 0.64 | Combination |  |

CIL & CIU, 95% confidence interval lower and upper limitation.
