# Supplementary material for: Network meta-analysis: application and practice using Stata
Source: PubMed Central journal article supplement (PMC5733388; doi:10.4178/epih.e2017047), 2017-10-27
Supplement: epih-39-e2017047-app3.pdf [file epih-39-e2017047-app3.pdf]

Appendix 3. The raw data for drawing a network funnel plot from data in appendix 1.

| t1 | t2 | design | diff   | se    |
|----|----|--------|--------|-------|
| A  | B  | A B    | -0.847 | 0.728 |
| A  | B  | A B    | -2.097 | 1.136 |
| A  | B  | A B    | 0.334  | 0.58  |
| A  | B  | A B    | -1.318 | 0.477 |
| A  | B  | A B    | -1.148 | 0.555 |
| A  | B  | A B    | -1.168 | 0.886 |
| A  | B  | A B    | -1.405 | 0.708 |
| A  | B  | A B    | -1.05  | 0.511 |
| A  | B  | A B    | 0      | 2.024 |
| A  | B  | A B C  | -0.72  | 0.526 |
| A  | B  | A B D  | -1.716 | 0.479 |
| A  | B  | A B E  | -1.169 | 0.483 |
| A  | C  | A B C  | -1.583 | 0.629 |
| A  | C  | A C    | -1.522 | 0.72  |
| A  | C  | A C    | 0      | 1.451 |
| A  | C  | A C    | -1.877 | 1.1   |
| A  | C  | A C    | -1.792 | 0.833 |
| A  | C  | A C    | -1.578 | 0.881 |
| A  | C  | A C    | -1.378 | 0.522 |
| A  | C  | A C    | -1.62  | 0.694 |
| A  | C  | A C    | -0.624 | 0.693 |
| A  | D  | A B D  | -1.727 | 0.479 |
| A  | D  | A D    | -1.197 | 0.413 |
| A  | D  | A D    | -0.606 | 0.793 |
| A  | D  | A D    | -1.554 | 0.686 |
| A  | E  | A B E  | -3.402 | 1.051 |
| B  | C  | A B C  | -0.863 | 0.666 |
| B  | D  | A B D  | -0.01  | 0.595 |
| B  | D  | B D E  | 0.266  | 0.733 |
| B  | E  | A B E  | -2.234 | 1.081 |
| B  | E  | B D E  | -1.989 | 1.521 |
| C  | D  | C D    | 0.49   | 0.492 |
| D  | E  | B D E  | -2.256 | 1.5   |

---
